# Supplementary material for: Retinal texture biomarkers may help to discriminate between Alzheimer’s, Parkinson’s, and healthy controls
Source: PubMed Central journal article supplement (PMC6588252; doi:10.1371/journal.pone.0218826), 2019-06-21
Supplement: pone.0218826.s003.pdf [file pone.0218826.s003.pdf]

| #  | Eyes  | Age | Gender | Disease duration | MoCA |
|----|-------|-----|--------|------------------|------|
| 1  | OD/OS | 76  | F      | 1                | 7    |
| 2  | OD/OS | 76  | M      | 1                | 21   |
| 3  | OD/OS | 73  | F      | 1                | 7    |
| 4  | OD/OS | 72  | M      | 1                | 14   |
| 5  | OD/OS | 72  | M      | 1                | 13   |
| 6  | OD/OS | 72  | F      | 0                | 12   |
| 7  | OD/OS | 71  | F      | 0                | 9    |
| 8  | OD/OS | 70  | F      | 2                | 16   |
| 9  | OD/OS | 69  | F      | 0                | 16   |
| 10 | OD/OS | 68  | F      | 0                | 10   |
| 11 | OD/OS | 68  | M      | 1                | 19   |
| 12 | OD/OS | 66  | M      | 0                | 18   |
| 13 | OD/OS | 65  | M      | 1                | 14   |
| 14 | OD/OS | 63  | F      | 1                | 17   |
| 15 | OD/OS | 61  | M      | 1                | 16   |
| 16 | OD/OS | 60  | F      | 1                | 10   |
| 17 | OD/OS | 58  | M      | 0                | 17   |
| 18 | OD/OS | 56  | F      | 0                | 17   |
| 19 | OD/OS | 55  | M      | 0                | 21   |
| 20 | OD    | 54  | M      | 0                | 13   |
