# Supplementary material for: Retinal texture biomarkers may help to discriminate between Alzheimer’s, Parkinson’s, and healthy controls
Source: PubMed Central journal article supplement (PMC6588252; doi:10.1371/journal.pone.0218826), 2019-06-21
Supplement: pone.0218826.s005.pdf [file pone.0218826.s005.pdf]

|     | <b>Alzheimer's disease</b> |      | <b>Parkinson's disease</b> |      | <b>Healthy controls</b> |      |
|-----|----------------------------|------|----------------------------|------|-------------------------|------|
| GCL | Difference Variance (Q2)   | 0.56 | Correlation (Q1)           | 0.53 | IMC2 (Q4)               | 0.52 |
|     | Dissimilarity (Q2)         | 0.57 | Sum Entropy (Q1)           | 0.57 | Variance +15° (Global)  | 0.64 |
|     | Inertia (Q2)               | 0.56 |                            |      | Variance -75° (Global)  | 0.68 |
| IPL | Correlation (Q1)           | 0.58 | Cluster Shade (Q1)         | 0.64 | Cluster Shade (Q1)      | 0.51 |
|     | Variance +75° (Global)     | 0.73 | Cluster Shade (Q2)         | 0.72 | Correlation (Q1)        | 0.71 |
|     | Variance -75° (Global)     | 0.69 | Uniformity (Q1)            | 0.72 | Variance +15° (Global)  | 0.68 |
|     |                            |      | Cluster Shade (Q4)         | 0.55 | Variance -15° (Global)  | 0.67 |
|     |                            |      | Entropy (Q4)               | 0.60 | Variance +75° (Global)  | 0.64 |
|     |                            |      | Sum Average (Q4)           | 0.59 | Variance -75° (Global)  | 0.64 |
|     |                            |      | Sum Entropy (Q4)           | 0.51 |                         |      |
| INL | Variance +15° (Global)     | 0.54 | Cluster Shade (Q1)         | 0.64 |                         |      |
|     | Variance -15° (Global)     | 0.56 |                            |      |                         |      |
| OPL | Sum Entropy (Q4)           | 0.51 |                            |      | Cluster Prominence (Q2) | 0.50 |
|     | Variance +15° (Global)     | 0.57 |                            |      | IMC1 (Q2)               | 0.52 |
|     | Variance -15° (Global)     | 0.55 |                            |      | IMC2 (Q2)               | 0.58 |
| ONL | IMC2 (Q1)                  | 0.50 |                            |      |                         |      |
